# Supplementary material
Source: ML conference proceedings conference paper supplement (https://openaccess.thecvf.com/content/CVPR2026/html/Khan_SIMSPINE_A_Biomechanics-Aware_CVPR_2026_paper.html)
Supplement: Supplementary file 1 [file 44426_supp.pdf › 44426_supp/44426_supp.pdf]

# SIMSPINE: A Biomechanics-Aware Simulation Framework for 3D Spine Motion Annotation and Benchmarking

## Supplementary Material

### A. Data Augmentation Curriculum

**Motivation.** We employ a three-phase augmentation schedule that transitions from heavy appearance and occlusion randomization to geometry-focused fine-tuning. This curriculum combines domain randomization with pose-specific augmentations such as half-body cropping and occlusion masking. The aim is to first promote invariance, then stabilize spatial priors, and finally refine keypoints with clean, low-noise data.

**Schedule.** Given  $E$  fine-tuning epochs ( $E=10$ ), augmentation stages switch at

$$e_1 = \lfloor 0.33E \rfloor, \quad e_2 = \lfloor 0.67E \rfloor,$$

producing intervals  $[0, e_1)$ ,  $[e_1, e_2)$ , and  $[e_2, E)$  for Stages 1–3.

#### A.1. Pipeline Overview

All stages share standard top-down cropping and affine normalization to a fixed input size ( $192 \times 256$ ), followed by target generation from augmented keypoints. Augmentation parameters are applied per sample with fixed random seeds for reproducibility.

**Stage 1 (hard)** Strong spatial and photometric perturbations for invariance:

- Random flip; half-body crop.
- Bounding-box transform: scale  $[0.5, 1.5]$ , rotation  $\pm 180^\circ$ .
- Photometric distortions (exposure, contrast, saturation, hue).
- Occlusion via CoarseDropout ( $p=1.0$ , one hole, height/width  $\in [0.2, 0.4]$ ).

**Stage 2 (medium)** Reduced occlusion and rotation for geometric stability:

- Random flip; half-body crop.
- Scale  $[0.5, 1.5]$ , rotation  $\pm 90^\circ$ .
- CoarseDropout ( $p=0.5$ , same hole size).

**Stage 3 (easy)** Geometry-only refinement with minimal noise:

- Random flip only.
  - Scale  $[0.5, 1.5]$ , rotation  $\pm 60^\circ$ .
  - No occlusion, blur, or photometric perturbation.
- Scale factors are relative to person crops.

#### A.2. Rationale

**Stage 1:** Large rotations and masking simulate extreme viewpoints and occlusions, driving the model to exploit

Table A1. **Augmentation curriculum** Probabilities ( $p$ ) are per-sample. CoarseDropout sizes are specified as fractions of the (pre-target) image after TopdownAffine.

| Parameter               | Stage 1                                                                                                                   | Stage 2                                                                               | Stage 3        |
|-------------------------|---------------------------------------------------------------------------------------------------------------------------|---------------------------------------------------------------------------------------|----------------|
| Epochs                  | $[0, e_1)$                                                                                                                | $[e_1, e_2)$                                                                          | $[e_2, E)$     |
| Rotation                | $\pm 180^\circ$                                                                                                           | $\pm 90^\circ$                                                                        | $\pm 60^\circ$ |
| Scale                   | $[0.5, 1.5]$                                                                                                              | $[0.5, 1.5]$                                                                          | $[0.5, 1.5]$   |
| Shift                   | (default)                                                                                                                 | 0.0                                                                                   | 0.0            |
| HalfBody                | ✓                                                                                                                         | ✓                                                                                     | ✗              |
| Photometric / Occlusion | Photometric;<br>Blur ( $p=0.1$ );<br>MedianBlur ( $p=0.1$ );<br>CoarseDropout ( $p=1.0$ , 1 hole, $h, w \in [0.2, 0.4]$ ) | Blur ( $p=0.1$ );<br>MedianBlur ( $p=0.1$ );<br>CoarseDropout ( $p=0.5$ , same sizes) | none           |

global skeletal cues and lighting invariance. **Stage 2:** Milder noise allows consolidation of geometric structure without overfitting to easy samples. **Stage 3:** Clean inputs promote precise coordinate optimization and whole-body consistency, improving AUC while maintaining robustness to real-world variation.

### B. SIMSPINE Details

Table B2. Lordosis and Kyphosis stats by Action and Subject

| Action       | LLA ( $\theta_l$ ) | TKA ( $\theta_k$ ) |
|--------------|--------------------|--------------------|
| Directions   | $37.38 \pm 5.51$   | $33.27 \pm 4.32$   |
| Discussion   | $36.42 \pm 2.72$   | $34.05 \pm 3.63$   |
| Eating       | $38.46 \pm 6.79$   | $32.57 \pm 4.50$   |
| Greeting     | $35.76 \pm 4.25$   | $30.45 \pm 5.10$   |
| Phoning      | $37.36 \pm 7.25$   | $35.84 \pm 5.33$   |
| Photo        | $36.99 \pm 2.87$   | $31.97 \pm 3.84$   |
| Posing       | $39.09 \pm 7.51$   | $32.91 \pm 6.76$   |
| Purchases    | $37.69 \pm 3.11$   | $33.35 \pm 4.10$   |
| Sitting      | $34.43 \pm 4.54$   | $35.57 \pm 3.94$   |
| SittingDown  | $35.96 \pm 6.00$   | $35.75 \pm 7.68$   |
| Smoking      | $34.94 \pm 3.21$   | $35.14 \pm 4.38$   |
| Waiting      | $36.21 \pm 3.60$   | $32.28 \pm 4.13$   |
| WalkDog      | $36.70 \pm 3.67$   | $31.39 \pm 5.13$   |
| WalkTogether | $35.97 \pm 2.18$   | $30.70 \pm 4.41$   |
| Walking      | $36.10 \pm 2.38$   | $31.60 \pm 5.17$   |
| Avg          | $36.63 \pm 4.37$   | $33.12 \pm 4.83$   |
| Subject      | LLA ( $\theta_l$ ) | TKA ( $\theta_k$ ) |
| S1           | $36.24 \pm 5.98$   | $32.51 \pm 4.25$   |
| S5           | $38.11 \pm 2.86$   | $31.88 \pm 3.99$   |
| S6           | $37.48 \pm 3.30$   | $37.35 \pm 4.63$   |
| S7           | $37.37 \pm 4.80$   | $32.63 \pm 6.14$   |
| S8           | $35.61 \pm 5.50$   | $33.95 \pm 5.44$   |
| S9           | $34.71 \pm 6.02$   | $32.70 \pm 5.61$   |
| S11          | $35.08 \pm 2.97$   | $34.27 \pm 3.52$   |
| Avg          | $36.37 \pm 4.49$   | $33.61 \pm 4.80$   |

Table B3. **SimSpine Anatomical Keypoints, Kinematic Axes, and Hierarchical Parent Links.** The dataset defines 37 anatomical keypoints covering full-body and spine-specific markers, grouped into Lumbar, Thoracic, Cervical, and Peripheral regions. Kinematic axes correspond to OpenSim-style rotational and translational degrees of freedom in the musculoskeletal model. Parent indices follow the hierarchical linkage used in forward kinematics. *Note: Due to licensing reasons, only 15 spine annotations are included in the released dataset. Body and feet annotations can be obtained from Human3.6M and H3WB datasets, respectively.*

| ID | Name        | Region   | Parent ID | Swap / Side | Associated Kinematic Axes (if any)                                                                               |
|----|-------------|----------|-----------|-------------|------------------------------------------------------------------------------------------------------------------|
| 0  | Nose        | Cervical | 17        | –           | neck_flexion, neck_bending, neck_rotation                                                                        |
| 1  | LEye        | Body     | 0         | REye        | –                                                                                                                |
| 2  | REye        | Body     | 0         | LEye        | –                                                                                                                |
| 3  | LEar        | Body     | 1         | REar        | –                                                                                                                |
| 4  | REar        | Body     | 2         | LEar        | –                                                                                                                |
| 5  | LShoulder   | Body     | 33        | RShoulder   | arm_flex_l, arm_add_l, arm_rot_l                                                                                 |
| 6  | RShoulder   | Body     | 34        | LShoulder   | arm_flex_r, arm_add_r, arm_rot_r                                                                                 |
| 7  | LElbow      | Body     | 5         | RElbow      | elbow_flex_l, pro_sup_l                                                                                          |
| 8  | RElbow      | Body     | 6         | LElbow      | elbow_flex_r, pro_sup_r                                                                                          |
| 9  | LWrist      | Body     | 7         | RWrist      | wrist_flex_l, wrist_dev_l                                                                                        |
| 10 | RWrist      | Body     | 8         | LWrist      | wrist_flex_r, wrist_dev_r                                                                                        |
| 11 | LHip        | Body     | 19        | RHip        | hip_flexion_l, hip_adduction_l, hip_rotation_l                                                                   |
| 12 | RHip        | Body     | 19        | LHip        | hip_flexion_r, hip_adduction_r, hip_rotation_r                                                                   |
| 13 | LKnee       | Body     | 11        | RKnee       | knee_angle_l, knee_angle_l.beta                                                                                  |
| 14 | RKnee       | Body     | 12        | LKnee       | knee_angle_r, knee_angle_r.beta                                                                                  |
| 15 | LAnkle      | Body     | 13        | RAnkle      | ankle_angle_l, subtalar_angle_l, mtp_angle_l                                                                     |
| 16 | RAnkle      | Body     | 14        | LAnkle      | ankle_angle_r, subtalar_angle_r, mtp_angle_r                                                                     |
| 17 | Head        | Cervical | 36        | –           | –                                                                                                                |
| 18 | Neck        | Cervical | 30        | –           | neck_flexion, neck_bending, neck_rotation                                                                        |
| 19 | Hip (Root)  | Lumbar   | -1        | –           | pelvis.tx, pelvis.ty, pelvis.tz, pelvis.tilt, pelvis.list, pelvis.rotation                                       |
| 20 | LBigToe     | Body     | 15        | RBigToe     | –                                                                                                                |
| 21 | RBigToe     | Body     | 16        | LBigToe     | –                                                                                                                |
| 22 | LSmallToe   | Body     | 20        | RSmallToe   | –                                                                                                                |
| 23 | RSmallToe   | Body     | 21        | LSmallToe   | –                                                                                                                |
| 24 | LHeel       | Body     | 15        | RHeel       | –                                                                                                                |
| 25 | RHeel       | Body     | 16        | LHeel       | –                                                                                                                |
| 26 | Spine.01    | Lumbar   | 19        | –           | L5_S1_Flex_Ext, L5_S1_Lat_Bending, L5_S1_axial_rotation, L4_L5_Flex_Ext, L4_L5_Lat_Bending, L4_L5_axial_rotation |
| 27 | Spine.02    | Lumbar   | 26        | –           | L3_L4_Flex_Ext, L3_L4_Lat_Bending, L3_L4_axial_rotation, L2_L3_Flex_Ext, L2_L3_Lat_Bending, L2_L3_axial_rotation |
| 28 | Spine.03    | Lumbar   | 27        | –           | L1_L2_Flex_Ext, L1_L2_Lat_Bending, L1_L2_axial_rotation                                                          |
| 29 | Spine.04    | Thoracic | 28        | –           | –                                                                                                                |
| 30 | Spine.05    | Thoracic | 29        | –           | –                                                                                                                |
| 31 | LLatissimus | Thoracic | 29        | RLatissimus | –                                                                                                                |
| 32 | RLatissimus | Thoracic | 29        | LLatissimus | –                                                                                                                |
| 33 | LClavicle   | Thoracic | 30        | RClavicle   | –                                                                                                                |
| 34 | RClavicle   | Thoracic | 30        | LClavicle   | –                                                                                                                |
| 35 | Neck.02     | Cervical | 18        | –           | L1_T12_Flex_Ext, L1_T12_Lat_Bending, L1_T12_axial_rotation                                                       |
| 36 | Neck.03     | Cervical | 35        | –           | –                                                                                                                |

#### Spine markers by region:

Lumbar (4): Hip, Spine.01, Spine.02, Spine.03.

Thoracic (6): Spine.04, Spine.05, 2xLatissimus, 2xClavicles.

Cervical (5): Nose, Head, Neck, Neck.02, Neck.03.

**Total keypoints:** 37 (Spine: 15 Body: 22).

## C. Additional Results

Figure C1 shows additional qualitative comparisons with the previous SOTA 2D tracker for spine pose estimation [31].

*Left:* On an internet frontal-view image with lateral bending, [31]’s tracker produces noisy, implausible locations for lower spine, upper neck, and clavicle points (circled in red), which our tracker corrects. *Middle:* On H36M validation samples using 2D tracking + multiview triangulation, [31] underestimates sagittal curves, and places clavicles behind the spine, which is anatomically impossible. *Right:* On two self-recorded front-facing bicycle views (novel motion), we compare sagittal curvature in 3D from [31] with our 2D-based reconstruction: [31] exhibits discontinuities, while our model yields a more realistic back posture, showing that our method and data go beyond simple 2D pose [31].

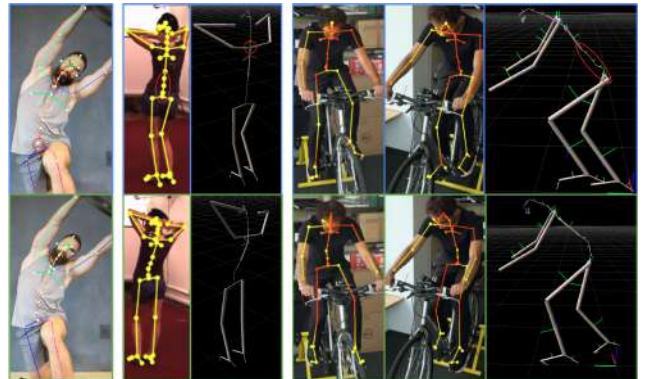

Figure C1. **Qualitative Evidence:** Comparison of the 2D tracker from [31] (top, blue) and our fine-tuned tracker on SIMSPINE (bottom, green). *Best viewed zoomed-in on a screen.*

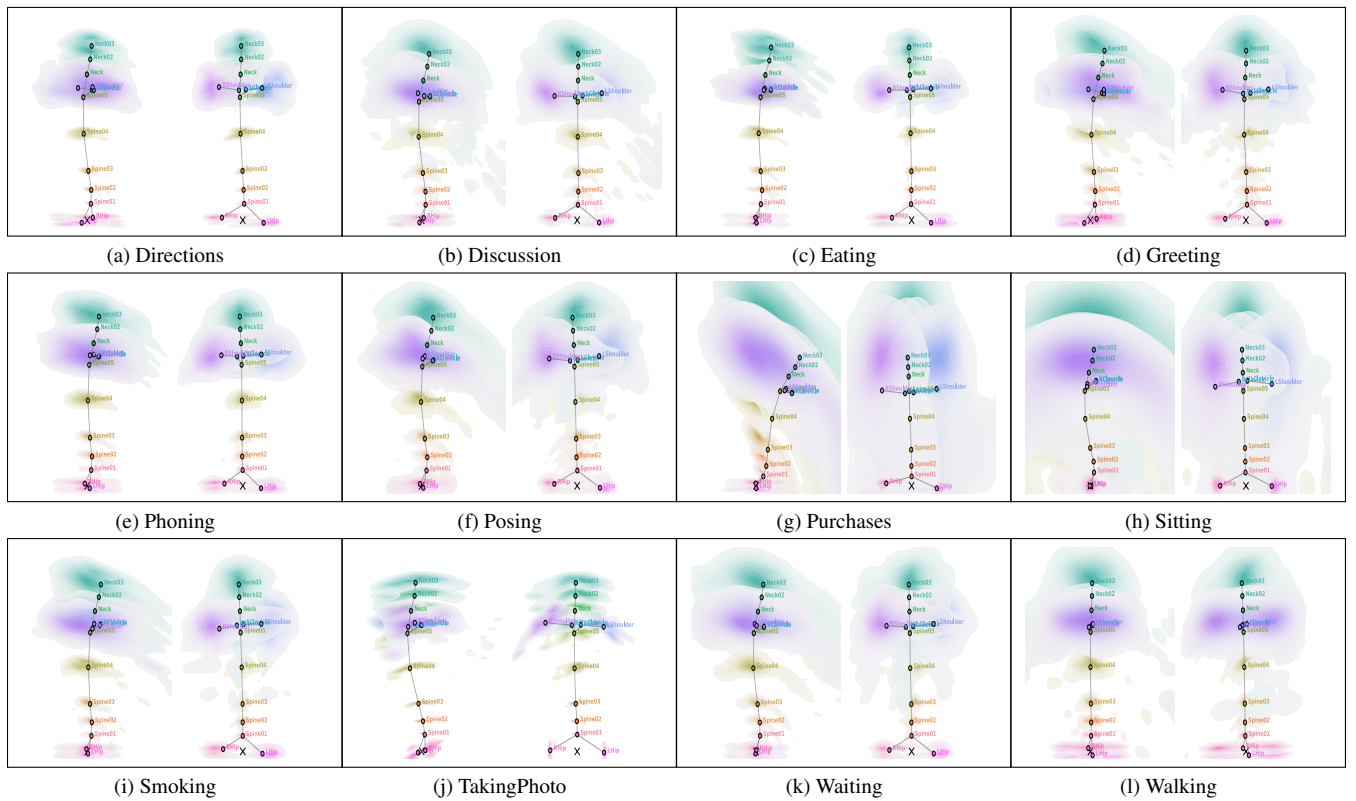

Figure C2. **Sagittal (Y-Z) and Frontal (X-Z) Distributions of Upper-Body Joint Positions Across Actions.** Each pair of panels shows the sagittal (left) and frontal (right) kernel-density contours of root-relative joint coordinates aggregated over all motion-capture frames of that action. Colored circles denote mean joint centers, and connecting lines depict the average kinematic chain. Sagittal views highlight action-specific curvature and torso inclination—e.g., pronounced flexion in *Sitting* and near-vertical alignment in *Walking*—whereas frontal views emphasize lateral symmetry and limited sideward spread, reflecting the bilateral consistency of the upper torso.

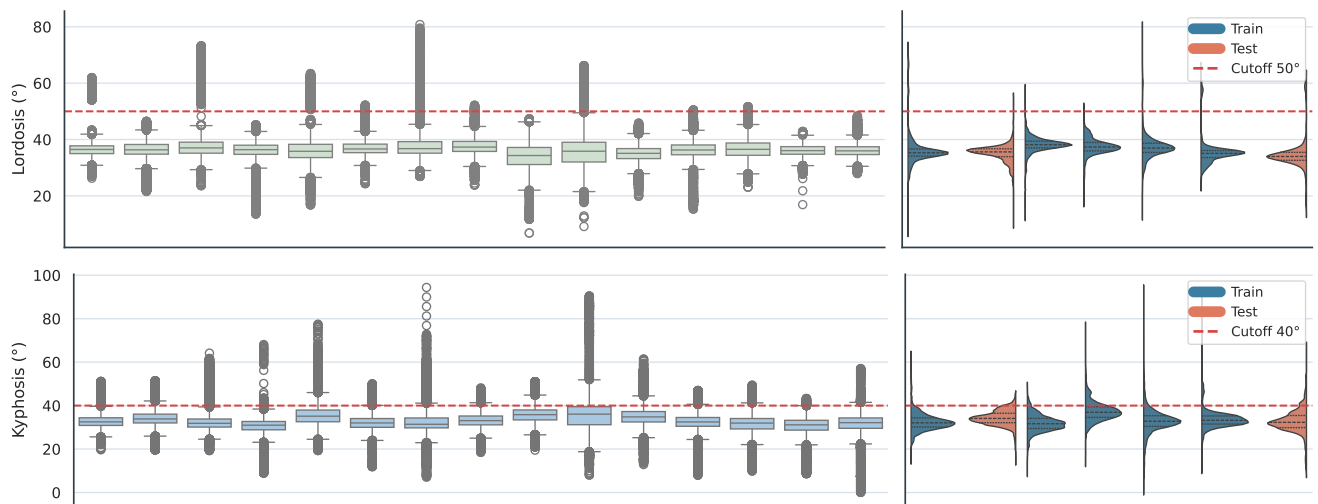

Figure C3. **Spine curvature boxplots to supplement the curvature summary** provided in Fig. 3 (left). We provide per-subject and per-action distributions and a reference cutoff value for “normal” lordosis and kyphosis in literature.
